# Supplementary material for: High virulence gene diversity in Streptococcus pyogenes isolated in Central Italy
Source: PubMed Central journal article supplement (PMC6431245; doi:10.7717/peerj.6613), 2019-03-20
Supplement: peerj-07-6613-s002.pdf [file peerj-07-6613-s002.pdf]

| Strain name | Source          | <i>emm</i> | <i>speC</i> | <i>speA</i> | <i>ssa</i> | <i>sdn</i> |
|-------------|-----------------|------------|-------------|-------------|------------|------------|
| MC001       | Oropharyngeal   | 48         | 0           | 0           | 0          | 1          |
| MC002       | Oropharyngeal   | 4          | 0           | 0           | 0          | 1          |
| MC003       | Oropharyngeal   | 89         | 1           | 0           | 0          | 0          |
| MC004       | Oropharyngeal   | 82         | 0           | 0           | 0          | 1          |
| MC005       | Oropharyngeal   | 18         | 0           | 0           | 0          | 0          |
| MC006       | Oropharyngeal   | 9          | 0           | 0           | 0          | 1          |
| MC007       | Oropharyngeal   | 1          | 1           | 1           | 0          | 0          |
| MC008       | Oropharyngeal   | 89         | 0           | 0           | 0          | 0          |
| MC009       | Oropharyngeal   | 44         | 0           | 0           | 1          | 1          |
| MC010       | Oropharyngeal   | 1          | 1           | 1           | 0          | 0          |
| MC012       | Oropharyngeal   | 4          | 1           | 1           | 1          | 1          |
| MC013       | Oropharyngeal   | 4          | 1           | 1           | 1          | 1          |
| MC014       | Oropharyngeal   | 75         | 0           | 1           | 0          | 1          |
| MC015       | Oropharyngeal   | 12         | 0           | 0           | 0          | 0          |
| MC016       | Oropharyngeal   | 1          | 0           | 0           | 0          | 0          |
| MC017       | Oropharyngeal   | 12         | 0           | 0           | 0          | 0          |
| MC018       | Oropharyngeal   | 11         | 1           | 0           | 0          | 0          |
| MC019       | Oropharyngeal   | 12         | 0           | 0           | 1          | 0          |
| MC020       | Oropharyngeal   | 4          | 1           | 0           | 0          | 1          |
| MC021       | Oropharyngeal   | 28         | 1           | 0           | 0          | 0          |
| MC022       | Oropharyngeal   | 44         | 0           | 1           | 1          | 1          |
| MC023       | Oropharyngeal   | 44         | 0           | 0           | 1          | 1          |
| MC025       | Oropharyngeal   | 12         | 0           | 0           | 0          | 0          |
| MC026       | Oropharyngeal   | 44         | 0           | 0           | 1          | 0          |
| PG001       | Oropharyngeal   | 29         | 0           | 0           | 0          | 0          |
| PG003       | Oropharyngeal   | 6          | 1           | 0           | 0          | 0          |
| PG004       | Oropharyngeal   | 75         | 0           | 0           | 0          | 0          |
| PG005       | Vaginal         | 89         | 1           | 0           | 0          | 0          |
| PG006       | Oropharyngeal   | 12         | 0           | 0           | 0          | 0          |
| PG007       | Oropharyngeal   | 118        | 1           | 0           | 0          | 1          |
| PG008       | Blood           | 6          | 0           | 0           | 0          | 0          |
| PG009       | Oropharyngeal   | 6          | 1           | 0           | 0          | 0          |
| PG010       | Oropharyngeal   | 6          | 1           | 0           | 0          | 0          |
| PG011       | Oropharyngeal   | 75         | 1           | 0           | 0          | 0          |
| PG012       | Oropharyngeal   | 6          | 1           | 0           | 0          | 0          |
| PG013       | Oropharyngeal   | 29         | 0           | 0           | 1          | 0          |
| PG014       | Oropharyngeal   | 29         | 0           | 0           | 0          | 0          |
| PG017       | Oropharyngeal   | 5          | 0           | 0           | 1          | 1          |
| PG018       | Oropharyngeal   | 5          | 0           | 0           | 1          | 0          |
| PG019       | Oropharyngeal   | 2          | 0           | 0           | 1          | 0          |
| PG020       | Bronchoalveolar | 29         | 0           | 0           | 0          | 1          |
| PG021       | Oropharyngeal   | 6          | 0           | 0           | 0          | 1          |
| PG022       | Oropharyngeal   | 89         | 0           | 0           | 0          | 0          |
| PG023       | Oropharyngeal   | 1          | 0           | 1           | 1          | 0          |
| PG024       | Oropharyngeal   | 29         | 0           | 0           | 0          | 1          |

|       |               |    |   |   |   |   |
|-------|---------------|----|---|---|---|---|
| PG025 | Oropharyngeal | 6  | 0 | 0 | 0 | 1 |
| PG026 | Oropharyngeal | 75 | 1 | 1 | 0 | 0 |
| PG027 | Oropharyngeal | 29 | 0 | 0 | 0 | 1 |
| PG028 | Oropharyngeal | 29 | 0 | 0 | 0 | 0 |
| PG029 | Oropharyngeal | 89 | 0 | 0 | 0 | 0 |
| PG030 | Skin          | 29 | 0 | 0 | 0 | 0 |
| PG031 | Oropharyngeal | 6  | 1 | 1 | 0 | 1 |
| PG032 | Oropharyngeal | 9  | 0 | 0 | 0 | 0 |
| PG033 | Skin          | 75 | 0 | 0 | 0 | 0 |
| PG034 | Oropharyngeal | 29 | 0 | 0 | 0 | 0 |
| PG036 | Oropharyngeal | 5  | 0 | 0 | 0 | 1 |
| PG037 | Blood         | 1  | 0 | 0 | 0 | 0 |
| PG038 | Vaginal       | 75 | 0 | 0 | 0 | 0 |
| PG039 | Oropharyngeal | 9  | 0 | 0 | 0 | 0 |
| PG040 | Oropharyngeal | 9  | 0 | 0 | 0 | 0 |
| PG042 | Oropharyngeal | 1  | 0 | 0 | 0 | 0 |
| PG043 | Oropharyngeal | 5  | 0 | 0 | 0 | 1 |
| PG044 | Oropharyngeal | 6  | 1 | 0 | 0 | 0 |
| PG045 | Oropharyngeal | 6  | 1 | 0 | 0 | 0 |
| PG046 | Oropharyngeal | 1  | 0 | 0 | 0 | 0 |
| PG047 | Oropharyngeal | 1  | 0 | 1 | 0 | 0 |
| PG048 | Rectal        | 89 | 0 | 0 | 0 | 0 |
| PG049 | Wound         | 89 | 0 | 0 | 0 | 0 |
| PG051 | Oropharyngeal | 29 | 0 | 0 | 0 | 0 |
| PG052 | Skin          | 89 | 0 | 0 | 0 | 0 |
| PG053 | Blood         | 1  | 0 | 0 | 0 | 0 |
| PG054 | Oropharyngeal | 4  | 0 | 1 | 0 | 0 |
| PG055 | Oropharyngeal | 44 | 1 | 0 | 1 | 0 |
| PG056 | Wound         | 18 | 0 | 0 | 0 | 0 |
| RM001 | Oropharyngeal | 18 | 0 | 0 | 1 | 0 |
| RM002 | Oropharyngeal | 12 | 0 | 0 | 0 | 0 |
| RM003 | Oropharyngeal | 4  | 1 | 0 | 1 | 0 |
| RM004 | Oropharyngeal | 18 | 0 | 1 | 0 | 0 |
| RM005 | Oropharyngeal | 12 | 0 | 0 | 0 | 0 |
| RM006 | Oropharyngeal | 4  | 0 | 0 | 1 | 1 |
| RM007 | Oropharyngeal | 4  | 0 | 0 | 1 | 1 |
| RM008 | Pleural       | 1  | 0 | 0 | 0 | 1 |
| RM009 | Oropharyngeal | 1  | 0 | 1 | 0 | 0 |
| RM010 | Skin          | 29 | 0 | 0 | 0 | 0 |
| RM011 | Oropharyngeal | 1  | 0 | 1 | 0 | 1 |
| RM012 | Oropharyngeal | 6  | 0 | 1 | 0 | 0 |
| RM013 | Oropharyngeal | 18 | 0 | 1 | 0 | 1 |
| RM014 | Oropharyngeal | 87 | 0 | 0 | 1 | 1 |
| RM015 | Oropharyngeal | 4  | 1 | 0 | 1 | 1 |
| RM016 | Oropharyngeal | 5  | 0 | 0 | 0 | 1 |
| RM017 | Oropharyngeal | 78 | 0 | 0 | 0 | 0 |

|       |               |    |   |   |   |   |
|-------|---------------|----|---|---|---|---|
| RM018 | Oropharyngeal | 6  | 0 | 1 | 0 | 1 |
| RM019 | Oropharyngeal | 75 | 1 | 0 | 0 | 1 |
| RM020 | Oropharyngeal | 12 | 1 | 0 | 0 | 1 |
| RM021 | Oropharyngeal | 4  | 1 | 0 | 1 | 1 |
| RM022 | Oropharyngeal | 44 | 1 | 0 | 1 | 1 |
| RM023 | Oropharyngeal | 44 | 0 | 0 | 1 | 0 |
| RM024 | Oropharyngeal | 18 | 0 | 1 | 0 | 1 |
| RM025 | Oropharyngeal | 87 | 1 | 0 | 1 | 1 |
| RM026 | Pleural       | 1  | 0 | 0 | 1 | 0 |
| RM027 | Oropharyngeal | 4  | 1 | 0 | 1 | 0 |
| RM028 | Oropharyngeal | 89 | 1 | 0 | 0 | 0 |
| RM029 | Oropharyngeal | 11 | 1 | 1 | 0 | 0 |
| RM030 | Oropharyngeal | 89 | 1 | 0 | 0 | 0 |
| RM031 | Oropharyngeal | 12 | 0 | 0 | 0 | 0 |
| RM032 | Oropharyngeal | 1  | 0 | 0 | 0 | 0 |
| RM033 | Oropharyngeal | 12 | 1 | 0 | 0 | 0 |
| RM034 | Oropharyngeal | 87 | 1 | 0 | 1 | 0 |
| RM035 | Oropharyngeal | 89 | 1 | 0 | 0 | 0 |
| RM036 | Oropharyngeal | 12 | 1 | 0 | 0 | 0 |
| RM037 | Oropharyngeal | 4  | 1 | 0 | 1 | 0 |
| RM038 | Oropharyngeal | 4  | 1 | 0 | 1 | 0 |
| RM039 | Oropharyngeal | 78 | 1 | 0 | 1 | 0 |
| RM040 | Oropharyngeal | 89 | 0 | 0 | 0 | 0 |
| RM041 | Oropharyngeal | 1  | 0 | 1 | 0 | 0 |
| RM042 | Oropharyngeal | 1  | 0 | 1 | 0 | 0 |
| RM043 | Oropharyngeal | 28 | 1 | 0 | 1 | 0 |
| RM044 | Oropharyngeal | 1  | 1 | 0 | 0 | 0 |
| RM045 | Oropharyngeal | 1  | 0 | 1 | 0 | 0 |
| RM046 | Oropharyngeal | 4  | 1 | 0 | 0 | 0 |
| RM047 | Oropharyngeal | 89 | 1 | 0 | 1 | 0 |
| RM048 | Oropharyngeal | 89 | 1 | 0 | 1 | 0 |

| sla | spek | speH | spel | speL | speM | speB |
|-----|------|------|------|------|------|------|
| 0   | 0    | 0    | 0    | 0    | 0    | 1    |
| 0   | 0    | 0    | 0    | 0    | 0    | 1    |
| 0   | 0    | 0    | 0    | 0    | 0    | 1    |
| 0   | 0    | 0    | 1    | 0    | 0    | 1    |
| 0   | 0    | 0    | 0    | 1    | 0    | 1    |
| 0   | 0    | 0    | 0    | 0    | 0    | 1    |
| 0   | 0    | 0    | 0    | 0    | 0    | 1    |
| 0   | 0    | 0    | 0    | 0    | 0    | 1    |
| 0   | 0    | 0    | 0    | 0    | 0    | 1    |
| 0   | 0    | 0    | 0    | 0    | 1    | 1    |
| 0   | 0    | 0    | 0    | 0    | 1    | 1    |
| 0   | 0    | 0    | 0    | 0    | 0    | 1    |
| 0   | 0    | 0    | 0    | 0    | 0    | 1    |
| 1   | 1    | 1    | 1    | 1    | 1    | 1    |
| 0   | 1    | 0    | 1    | 1    | 0    | 1    |
| 0   | 0    | 0    | 0    | 0    | 0    | 1    |
| 0   | 1    | 0    | 1    | 0    | 1    | 1    |
| 0   | 1    | 0    | 1    | 0    | 1    | 1    |
| 0   | 1    | 0    | 1    | 0    | 1    | 1    |
| 0   | 0    | 0    | 0    | 0    | 0    | 1    |
| 1   | 0    | 1    | 0    | 0    | 0    | 1    |
| 0   | 0    | 0    | 0    | 0    | 1    | 1    |
| 0   | 0    | 0    | 0    | 0    | 0    | 1    |
| 0   | 1    | 0    | 1    | 0    | 0    | 1    |
| 0   | 0    | 0    | 0    | 0    | 0    | 1    |
| 0   | 0    | 0    | 0    | 1    | 0    | 1    |
| 0   | 0    | 1    | 0    | 0    | 0    | 1    |
| 0   | 0    | 0    | 0    | 1    | 0    | 1    |
| 0   | 0    | 0    | 0    | 0    | 0    | 1    |
| 0   | 0    | 1    | 0    | 0    | 0    | 1    |
| 0   | 0    | 0    | 0    | 0    | 0    | 1    |
| 1   | 1    | 1    | 0    | 0    | 0    | 1    |
| 1   | 0    | 1    | 1    | 0    | 0    | 1    |
| 1   | 1    | 1    | 0    | 0    | 0    | 1    |
| 0   | 0    | 0    | 0    | 1    | 0    | 1    |
| 1   | 1    | 1    | 1    | 0    | 0    | 1    |
| 0   | 0    | 0    | 0    | 1    | 0    | 1    |
| 0   | 0    | 0    | 0    | 1    | 1    | 1    |
| 0   | 0    | 0    | 0    | 0    | 0    | 1    |
| 0   | 0    | 0    | 0    | 0    | 0    | 1    |
| 0   | 0    | 0    | 0    | 0    | 0    | 1    |
| 0   | 0    | 0    | 0    | 0    | 1    | 1    |
| 1   | 0    | 1    | 0    | 0    | 0    | 1    |
| 0   | 0    | 0    | 0    | 0    | 0    | 1    |
| 0   | 0    | 0    | 0    | 0    | 1    | 1    |
| 0   | 0    | 0    | 0    | 1    | 1    | 1    |



|   |   |   |   |   |   |   |
|---|---|---|---|---|---|---|
| 1 | 1 | 1 | 0 | 0 | 0 | 1 |
| 0 | 1 | 0 | 0 | 1 | 1 | 1 |
| 0 | 0 | 1 | 0 | 1 | 0 | 1 |
| 0 | 0 | 0 | 0 | 1 | 1 | 1 |
| 1 | 1 | 0 | 0 | 1 | 1 | 1 |
| 1 | 1 | 0 | 0 | 0 | 1 | 1 |
| 0 | 0 | 0 | 0 | 1 | 1 | 1 |
| 0 | 0 | 0 | 0 | 0 | 0 | 1 |
| 0 | 0 | 1 | 0 | 0 | 0 | 1 |
| 0 | 0 | 1 | 0 | 0 | 0 | 1 |
| 0 | 0 | 0 | 0 | 0 | 0 | 1 |
| 0 | 0 | 1 | 0 | 0 | 0 | 1 |
| 0 | 0 | 0 | 0 | 0 | 0 | 1 |
| 0 | 0 | 1 | 0 | 0 | 0 | 1 |
| 0 | 0 | 0 | 0 | 0 | 0 | 1 |
| 0 | 0 | 1 | 0 | 0 | 0 | 1 |
| 0 | 0 | 0 | 0 | 0 | 0 | 1 |
| 0 | 0 | 0 | 0 | 0 | 0 | 1 |
| 0 | 0 | 1 | 0 | 0 | 0 | 1 |
| 0 | 0 | 0 | 0 | 0 | 0 | 1 |
| 0 | 0 | 0 | 0 | 0 | 0 | 1 |
| 0 | 0 | 0 | 0 | 0 | 0 | 1 |
| 0 | 0 | 0 | 0 | 0 | 0 | 1 |
| 0 | 0 | 0 | 1 | 0 | 0 | 1 |
| 0 | 0 | 0 | 1 | 0 | 0 | 1 |
| 0 | 0 | 0 | 1 | 0 | 0 | 1 |
| 0 | 0 | 1 | 1 | 0 | 0 | 1 |
| 0 | 0 | 1 | 1 | 0 | 0 | 1 |
| 0 | 0 | 0 | 0 | 0 | 0 | 1 |
| 0 | 0 | 0 | 0 | 0 | 0 | 1 |

| smeZ | prtF1 | cpa | prtF2 | sipA2 | bridge | fctA |
|------|-------|-----|-------|-------|--------|------|
| 0    | 1     | 0   | 0     | 0     | 0      | 0    |
| 0    | 1     | 0   | 0     | 0     | 0      | 0    |
| 0    | 1     | 0   | 0     | 0     | 1      | 0    |
| 0    | 1     | 0   | 1     | 0     | 1      | 0    |
| 1    | 0     | 1   | 1     | 1     | 1      | 0    |
| 0    | 1     | 0   | 1     | 1     | 0      | 1    |
| 1    | 0     | 0   | 0     | 0     | 0      | 0    |
| 0    | 1     | 1   | 1     | 1     | 1      | 0    |
| 0    | 1     | 1   | 1     | 1     | 1      | 0    |
| 1    | 0     | 0   | 0     | 0     | 0      | 0    |
| 1    | 1     | 0   | 0     | 0     | 0      | 0    |
| 1    | 1     | 0   | 0     | 0     | 0      | 0    |
| 0    | 1     | 0   | 0     | 0     | 0      | 0    |
| 0    | 1     | 1   | 1     | 1     | 1      | 1    |
| 1    | 0     | 0   | 0     | 0     | 0      | 0    |
| 0    | 1     | 1   | 1     | 1     | 1      | 1    |
| 0    | 1     | 1   | 1     | 1     | 0      | 1    |
| 0    | 1     | 1   | 1     | 1     | 1      | 1    |
| 1    | 1     | 0   | 0     | 0     | 0      | 0    |
| 0    | 1     | 1   | 1     | 1     | 1      | 1    |
| 1    | 1     | 1   | 1     | 1     | 1      | 1    |
| 0    | 1     | 1   | 1     | 1     | 1      | 1    |
| 0    | 1     | 0   | 1     | 1     | 1      | 0    |
| 0    | 1     | 0   | 1     | 1     | 1      | 1    |
| 0    | 0     | 1   | 1     | 1     | 1      | 1    |
| 0    | 1     | 0   | 0     | 0     | 0      | 0    |
| 0    | 1     | 0   | 0     | 0     | 0      | 0    |
| 0    | 1     | 1   | 0     | 1     | 0      | 1    |
| 0    | 1     | 1   | 1     | 1     | 1      | 0    |
| 1    | 1     | 1   | 1     | 1     | 1      | 1    |
| 0    | 1     | 0   | 0     | 0     | 0      | 0    |
| 0    | 1     | 0   | 0     | 0     | 0      | 0    |
| 0    | 1     | 0   | 0     | 0     | 0      | 0    |
| 0    | 1     | 0   | 0     | 0     | 0      | 0    |
| 0    | 1     | 0   | 0     | 0     | 0      | 0    |
| 1    | 0     | 1   | 1     | 1     | 1      | 1    |
| 0    | 0     | 1   | 1     | 1     | 0      | 0    |
| 0    | 0     | 1   | 1     | 1     | 1      | 1    |
| 0    | 0     | 1   | 1     | 1     | 0      | 0    |
| 0    | 1     | 0   | 0     | 0     | 1      | 0    |
| 0    | 1     | 1   | 1     | 1     | 0      | 1    |
| 0    | 1     | 0   | 0     | 0     | 1      | 0    |
| 0    | 1     | 1   | 1     | 1     | 0      | 0    |
| 0    | 1     | 0   | 0     | 0     | 1      | 0    |
| 1    | 0     | 1   | 1     | 1     | 0      | 1    |

|   |   |   |   |   |   |   |
|---|---|---|---|---|---|---|
| 1 | 1 | 0 | 0 | 0 | 0 | 0 |
| 0 | 1 | 0 | 0 | 0 | 1 | 0 |
| 0 | 0 | 1 | 1 | 1 | 1 | 0 |
| 0 | 1 | 1 | 1 | 1 | 1 | 1 |
| 0 | 1 | 1 | 1 | 1 | 1 | 1 |
| 1 | 0 | 1 | 1 | 1 | 1 | 1 |
| 0 | 1 | 0 | 1 | 1 | 0 | 0 |
| 0 | 1 | 0 | 1 | 1 | 0 | 0 |
| 0 | 1 | 0 | 0 | 0 | 0 | 0 |
| 0 | 0 | 1 | 1 | 1 | 0 | 1 |
| 0 | 0 | 1 | 1 | 1 | 1 | 0 |
| 0 | 0 | 0 | 0 | 0 | 0 | 0 |
| 0 | 1 | 0 | 0 | 0 | 0 | 0 |
| 0 | 0 | 0 | 1 | 1 | 0 | 1 |
| 0 | 1 | 0 | 1 | 1 | 0 | 1 |
| 0 | 0 | 0 | 0 | 0 | 0 | 0 |
| 0 | 0 | 1 | 1 | 1 | 1 | 0 |
| 0 | 0 | 0 | 0 | 0 | 0 | 0 |
| 0 | 0 | 0 | 0 | 0 | 0 | 0 |
| 0 | 0 | 0 | 0 | 0 | 0 | 0 |
| 0 | 0 | 0 | 0 | 1 | 0 | 0 |
| 0 | 1 | 1 | 1 | 1 | 0 | 1 |
| 0 | 1 | 1 | 1 | 1 | 0 | 1 |
| 0 | 0 | 1 | 0 | 1 | 0 | 1 |
| 0 | 1 | 1 | 1 | 1 | 1 | 1 |
| 1 | 0 | 0 | 0 | 0 | 0 | 0 |
| 1 | 0 | 0 | 0 | 0 | 0 | 0 |
| 0 | 1 | 1 | 1 | 1 | 1 | 1 |
| 1 | 0 | 1 | 1 | 1 | 0 | 1 |
| 1 | 0 | 1 | 1 | 1 | 0 | 0 |
| 0 | 1 | 1 | 1 | 1 | 1 | 0 |
| 0 | 1 | 0 | 0 | 0 | 0 | 0 |
| 1 | 0 | 1 | 1 | 1 | 0 | 0 |
| 0 | 1 | 1 | 1 | 1 | 1 | 0 |
| 0 | 1 | 0 | 0 | 0 | 0 | 0 |
| 0 | 1 | 0 | 0 | 0 | 0 | 0 |
| 0 | 0 | 0 | 0 | 1 | 0 | 0 |
| 0 | 0 | 0 | 0 | 0 | 0 | 0 |
| 0 | 0 | 1 | 1 | 1 | 1 | 1 |
| 1 | 0 | 0 | 0 | 1 | 0 | 0 |
| 0 | 0 | 0 | 0 | 0 | 0 | 0 |
| 0 | 0 | 1 | 1 | 1 | 1 | 1 |
| 0 | 0 | 1 | 1 | 1 | 1 | 1 |
| 1 | 0 | 0 | 0 | 0 | 0 | 0 |
| 1 | 0 | 1 | 1 | 1 | 1 | 1 |
| 0 | 1 | 1 | 1 | 1 | 0 | 0 |



|   |   |   |   |   |   |   |
|---|---|---|---|---|---|---|
| 0 | 0 | 0 | 0 | 1 | 0 | 0 |
| 0 | 1 | 0 | 0 | 0 | 0 | 0 |
| 0 | 0 | 1 | 1 | 1 | 1 | 1 |
| 1 | 1 | 0 | 1 | 0 | 0 | 0 |
| 0 | 1 | 1 | 1 | 1 | 1 | 1 |
| 0 | 1 | 1 | 1 | 1 | 1 | 1 |
| 1 | 0 | 1 | 1 | 1 | 1 | 1 |
| 1 | 1 | 1 | 1 | 1 | 1 | 0 |
| 0 | 0 | 0 | 0 | 0 | 0 | 0 |
| 1 | 0 | 0 | 0 | 0 | 0 | 0 |
| 0 | 1 | 1 | 1 | 1 | 1 | 0 |
| 0 | 1 | 1 | 1 | 1 | 0 | 1 |
| 0 | 1 | 1 | 1 | 1 | 1 | 0 |
| 0 | 1 | 1 | 1 | 0 | 1 | 0 |
| 0 | 0 | 0 | 0 | 0 | 0 | 0 |
| 0 | 1 | 1 | 1 | 1 | 1 | 0 |
| 0 | 0 | 1 | 1 | 1 | 1 | 0 |
| 0 | 1 | 1 | 1 | 1 | 1 | 0 |
| 0 | 0 | 1 | 1 | 1 | 1 | 0 |
| 1 | 1 | 0 | 1 | 0 | 0 | 0 |
| 1 | 0 | 0 | 0 | 0 | 0 | 0 |
| 0 | 1 | 1 | 1 | 1 | 0 | 1 |
| 0 | 1 | 1 | 1 | 1 | 1 | 0 |
| 1 | 0 | 0 | 1 | 1 | 0 | 0 |
| 1 | 0 | 0 | 1 | 0 | 0 | 0 |
| 0 | 1 | 1 | 1 | 1 | 1 | 0 |
| 0 | 1 | 1 | 1 | 1 | 1 | 0 |
| 1 | 1 | 0 | 1 | 0 | 0 | 0 |
| 0 | 1 | 1 | 1 | 1 | 0 | 1 |
| 1 | 1 | 0 | 0 | 0 | 0 | 0 |
| 0 | 1 | 1 | 1 | 1 | 1 | 1 |

| srtC2 | fctB | srtB | rofA | nra |
|-------|------|------|------|-----|
| 0     | 0    | 0    | 1    | 0   |
| 0     | 0    | 0    | 1    | 0   |
| 0     | 0    | 0    | 1    | 0   |
| 1     | 1    | 0    | 1    | 0   |
| 1     | 1    | 1    | 0    | 1   |
| 1     | 1    | 1    | 1    | 0   |
| 0     | 0    | 0    | 1    | 0   |
| 1     | 1    | 1    | 1    | 0   |
| 1     | 1    | 1    | 1    | 0   |
| 0     | 0    | 1    | 1    | 0   |
| 0     | 0    | 0    | 1    | 0   |
| 0     | 0    | 0    | 1    | 0   |
| 0     | 0    | 0    | 1    | 0   |
| 1     | 1    | 1    | 1    | 0   |
| 0     | 0    | 0    | 1    | 0   |
| 1     | 1    | 1    | 1    | 0   |
| 1     | 1    | 1    | 1    | 0   |
| 1     | 1    | 1    | 1    | 0   |
| 0     | 0    | 0    | 1    | 0   |
| 1     | 1    | 1    | 1    | 0   |
| 1     | 1    | 1    | 1    | 0   |
| 1     | 1    | 1    | 1    | 0   |
| 1     | 1    | 1    | 1    | 0   |
| 1     | 1    | 1    | 1    | 0   |
| 1     | 1    | 1    | 1    | 0   |
| 1     | 1    | 1    | 1    | 0   |
| 1     | 1    | 1    | 1    | 0   |
| 1     | 1    | 0    | 0    | 1   |
| 0     | 0    | 0    | 1    | 0   |
| 0     | 0    | 0    | 1    | 0   |
| 1     | 1    | 1    | 1    | 0   |
| 1     | 1    | 1    | 1    | 0   |
| 1     | 1    | 1    | 1    | 0   |
| 0     | 0    | 0    | 1    | 0   |
| 0     | 0    | 0    | 1    | 0   |
| 0     | 0    | 0    | 1    | 0   |
| 0     | 0    | 0    | 1    | 0   |
| 0     | 0    | 0    | 1    | 0   |
| 1     | 1    | 0    | 0    | 1   |
| 1     | 1    | 0    | 0    | 1   |
| 1     | 1    | 0    | 0    | 1   |
| 1     | 1    | 0    | 0    | 1   |
| 0     | 0    | 0    | 1    | 0   |
| 1     | 1    | 0    | 0    | 1   |
| 0     | 0    | 1    | 1    | 0   |
| 1     | 1    | 1    | 1    | 0   |
| 0     | 0    | 1    | 1    | 0   |
| 1     | 1    | 1    | 1    | 0   |
| 0     | 0    | 1    | 1    | 0   |
| 1     | 1    | 0    | 0    | 1   |

|   |   |   |   |   |
|---|---|---|---|---|
| 0 | 0 | 0 | 1 | 0 |
| 0 | 0 | 1 | 1 | 0 |
| 1 | 1 | 0 | 0 | 1 |
| 1 | 1 | 0 | 0 | 1 |
| 1 | 1 | 1 | 1 | 0 |
| 1 | 1 | 0 | 0 | 1 |
| 0 | 1 | 1 | 1 | 0 |
| 1 | 1 | 1 | 1 | 0 |
| 0 | 0 | 0 | 1 | 0 |
| 1 | 1 | 0 | 0 | 1 |
| 1 | 1 | 0 | 0 | 1 |
| 0 | 0 | 0 | 1 | 0 |
| 0 | 0 | 0 | 1 | 0 |
| 1 | 0 | 1 | 1 | 0 |
| 0 | 1 | 0 | 1 | 0 |
| 0 | 0 | 0 | 1 | 0 |
| 1 | 1 | 0 | 0 | 1 |
| 0 | 0 | 1 | 1 | 0 |
| 0 | 0 | 1 | 1 | 0 |
| 0 | 0 | 1 | 0 | 1 |
| 0 | 0 | 1 | 0 | 1 |
| 1 | 1 | 1 | 1 | 0 |
| 1 | 1 | 1 | 1 | 0 |
| 1 | 1 | 1 | 0 | 1 |
| 1 | 1 | 1 | 1 | 0 |
| 0 | 0 | 1 | 1 | 0 |
| 0 | 0 | 0 | 1 | 0 |
| 1 | 1 | 1 | 1 | 0 |
| 1 | 1 | 0 | 0 | 1 |
| 0 | 1 | 0 | 0 | 1 |
| 1 | 1 | 1 | 1 | 0 |
| 0 | 0 | 0 | 1 | 0 |
| 1 | 1 | 0 | 0 | 1 |
| 0 | 0 | 0 | 1 | 0 |
| 0 | 0 | 0 | 1 | 0 |
| 0 | 0 | 0 | 1 | 0 |
| 1 | 1 | 0 | 0 | 1 |
| 0 | 0 | 1 | 1 | 0 |
| 0 | 0 | 0 | 1 | 0 |
| 0 | 1 | 0 | 1 | 0 |
| 1 | 1 | 0 | 0 | 1 |
| 0 | 0 | 0 | 1 | 0 |
| 1 | 1 | 0 | 1 | 0 |
| 1 | 1 | 1 | 1 | 0 |

|   |   |   |   |   |
|---|---|---|---|---|
| 0 | 0 | 1 | 1 | 0 |
| 0 | 0 | 0 | 1 | 0 |
| 1 | 1 | 1 | 1 | 0 |
| 0 | 0 | 0 | 1 | 0 |
| 1 | 1 | 1 | 1 | 0 |
| 1 | 1 | 1 | 1 | 0 |
| 1 | 1 | 0 | 1 | 0 |
| 1 | 1 | 1 | 1 | 0 |
| 0 | 0 | 0 | 1 | 0 |
| 0 | 0 | 0 | 1 | 0 |
| 1 | 1 | 1 | 1 | 0 |
| 1 | 1 | 1 | 1 | 0 |
| 1 | 1 | 1 | 1 | 0 |
| 1 | 1 | 1 | 1 | 0 |
| 0 | 0 | 0 | 1 | 0 |
| 1 | 1 | 1 | 1 | 0 |
| 1 | 1 | 1 | 1 | 0 |
| 1 | 1 | 1 | 1 | 0 |
| 1 | 1 | 0 | 1 | 0 |
| 0 | 0 | 1 | 1 | 0 |
| 0 | 0 | 0 | 1 | 0 |
| 1 | 1 | 1 | 1 | 0 |
| 1 | 1 | 1 | 1 | 0 |
| 1 | 1 | 1 | 1 | 0 |
| 1 | 1 | 1 | 1 | 0 |
| 1 | 0 | 1 | 1 | 0 |
| 1 | 1 | 1 | 1 | 0 |
| 1 | 1 | 1 | 0 | 1 |
| 0 | 0 | 1 | 1 | 0 |
| 1 | 1 | 1 | 1 | 0 |
| 0 | 0 | 0 | 1 | 0 |
| 1 | 1 | 1 | 1 | 0 |
